# Supplementary material for: A-π-D-π-A-Based Small Molecules for OTFTs Containing Diketopyrrolopyrrole as Acceptor Units
Source: MDPI journal article supplement (doi:10.3390/mi12070817), 2021-07-13
Supplement: s1 [file s1]

Supplementary File

# A- $\pi$ -D- $\pi$ -A-Based Small Molecules for OTFTs Containing Diketopyrrolopyrrole as Acceptor Units

Baji Shaik <sup>1</sup>, Mujeeb Khan <sup>2</sup>, Mohammed Rafi Shaik <sup>2,\*</sup>, Mohammed A.F. Sharaf <sup>3</sup>, Doumbia Sekou <sup>4</sup> and Sang-Gyeong Lee <sup>1,\*</sup>

**Citation:** Shaik, B.; Khan, M.; Shaik, M.R.; Sharaf, M.A.F.; Sekou, D.; Lee, S.-G. A- $\pi$ -D- $\pi$ -A Based Small Molecules for OTFTs Containing Diketopyrrolopyrrole as Acceptor Units. *Micromachines* **2021**, *12*, 817. <https://doi.org/10.3390/mi12070817>

Academic Editors: Hcheon Yoo and Joohoon Kang

Received: 19 May 2021

Accepted: 11 July 2021

Published: 13 July 2021

**Publisher's Note:** MDPI stays neutral with regard to jurisdictional claims in published maps and institutional affiliations.

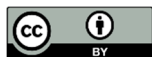

**Copyright:** © 2021 by the authors. Licensee MDPI, Basel, Switzerland. This article is an open access article distributed under the terms and conditions of the Creative Commons Attribution (CC BY) license (<http://creativecommons.org/licenses/by/4.0/>).

<sup>1</sup> Department of Chemistry, Research Institute of Natural Science (RINS), Graduate School for Molecular Materials and Nanochemistry, Gyeongsang National University, Jinju 660-701, South Korea; shaikbaji2@gmail.com

<sup>2</sup> Department of Chemistry, College of Science, King Saud University, P.O. Box 2455, Riyadh 11451, Saudi Arabia; kmujeeb@ksu.edu.sa

<sup>3</sup> Department of Industrial Engineering, College of Engineering, King Saud University, P.O. Box 800, Riyadh 11421, Saudi Arabia; mfsharaf@ksu.edu.sa

<sup>4</sup> Department of Agricultural Extension and Rural Society, College of Food and Agriculture Sciences, King Saud University, P.O. Box 2460, Riyadh 11451, Saudi Arabia; 442106474@student.ksu.edu.sa

\* Correspondence: mrshaik@ksu.edu.sa (M.R.S.); leesang@gnu.ac.kr (S.-G.L.); Tel.: +966-11-4670439 (M.R.S.)

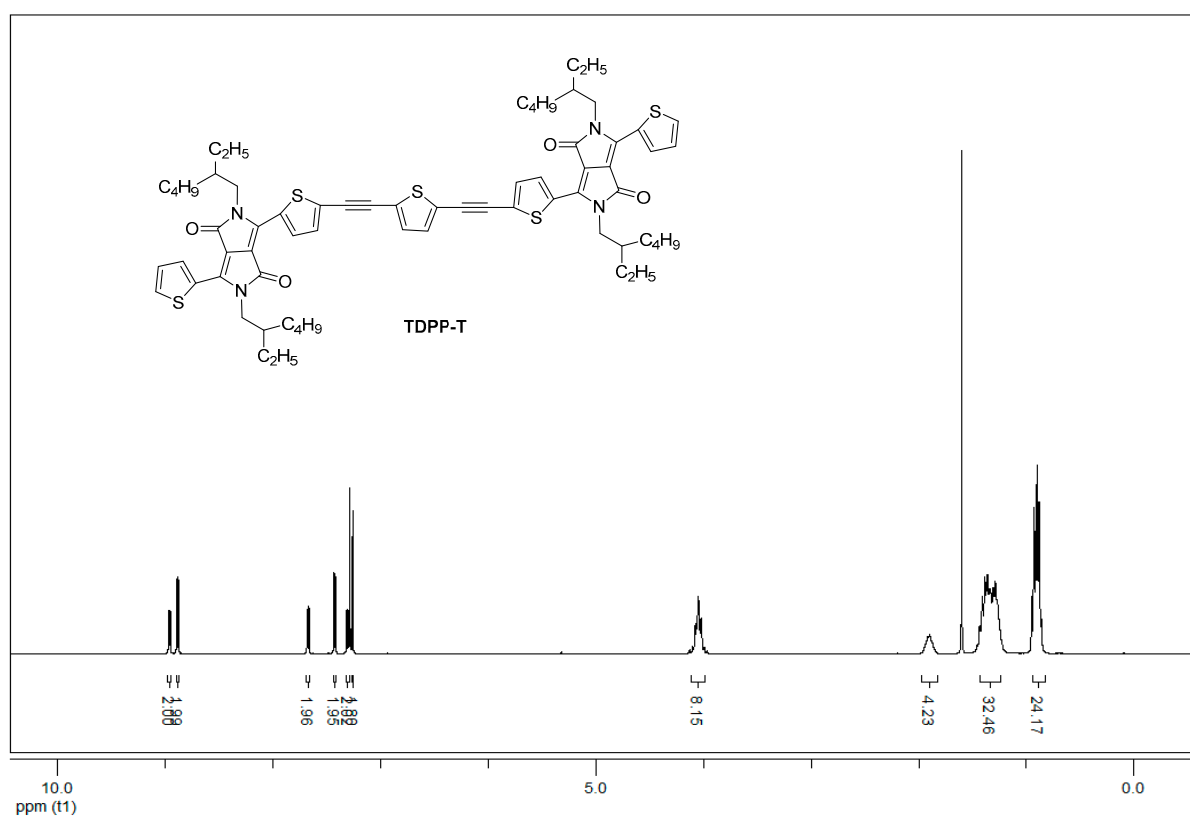

**Figure S1.**  $^1\text{H}$  NMR (300 MHz,  $\text{CDCl}_3$ ) spectrum of compound TDPP-T.

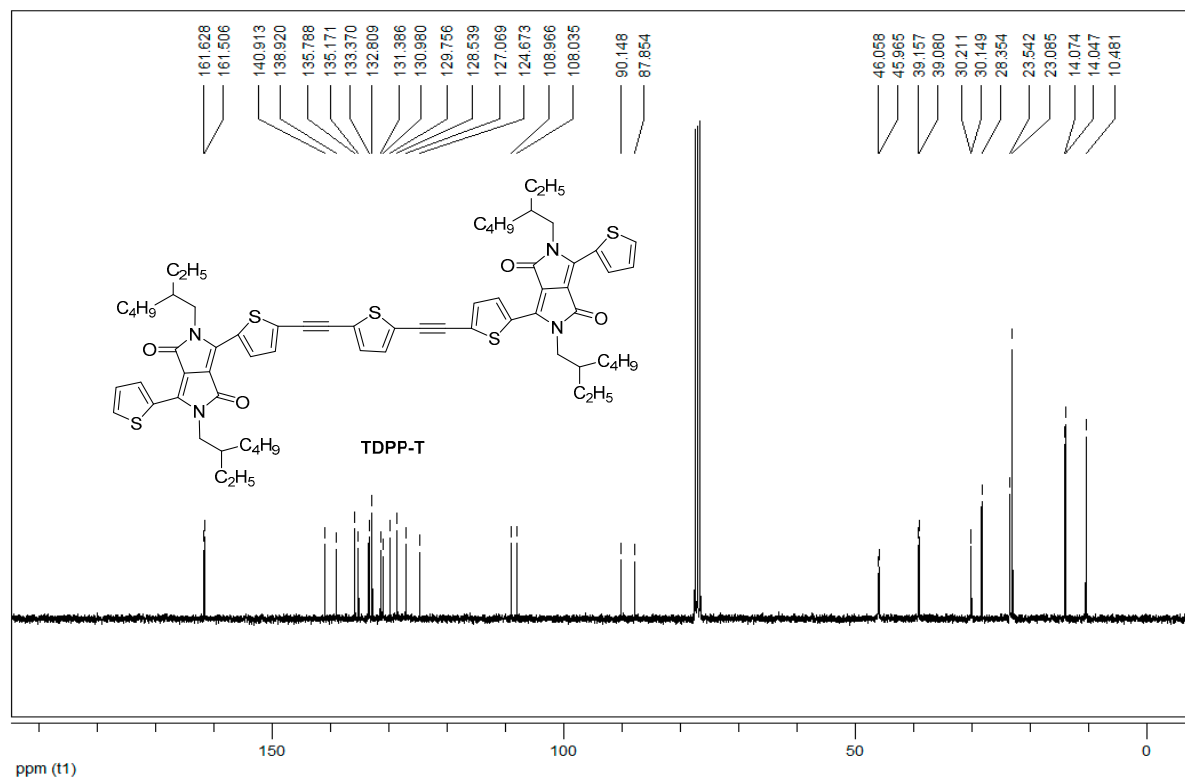

**Figure S2.** <sup>13</sup>C NMR (75 MHz, CDCl<sub>3</sub>) spectrum of compound TDPP-T.

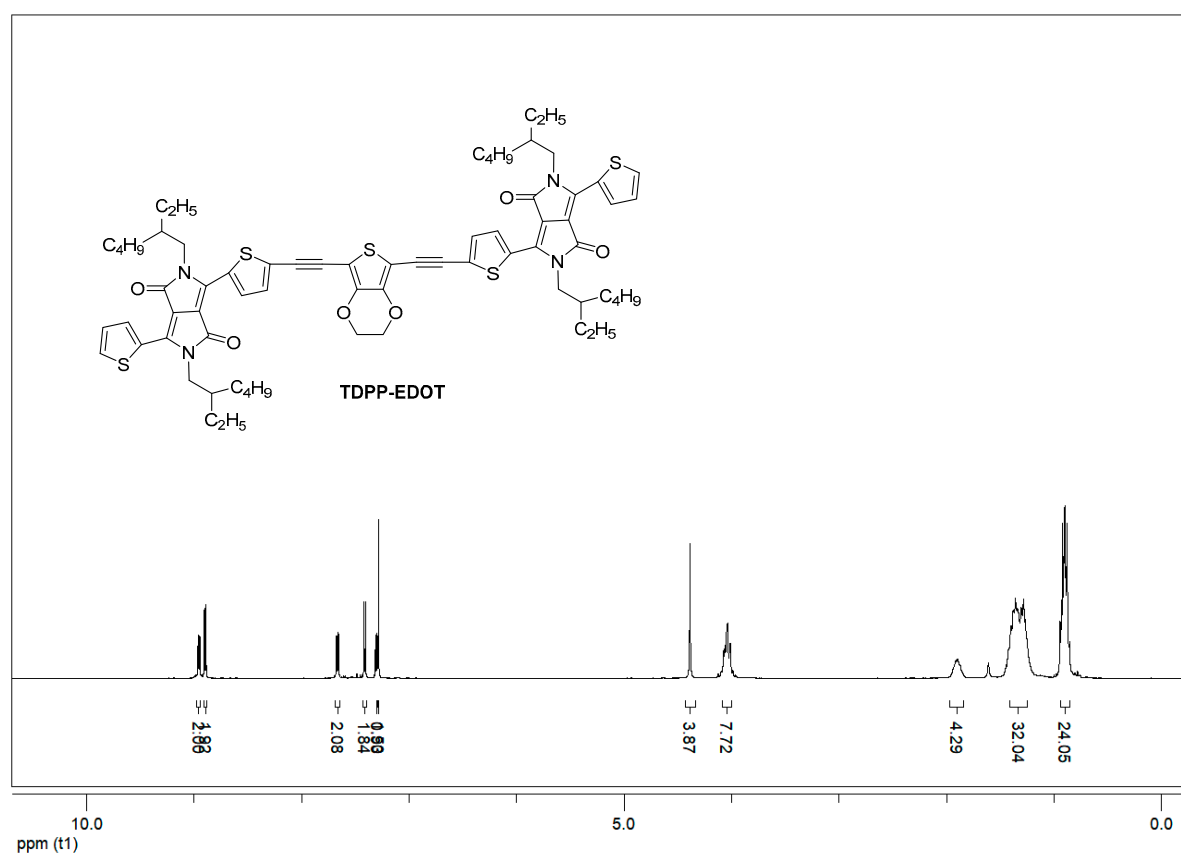

**Figure S3.**  $^1\text{H}$  NMR (300 MHz,  $\text{CDCl}_3$ ) spectrum of compound TDPP-EDOT.

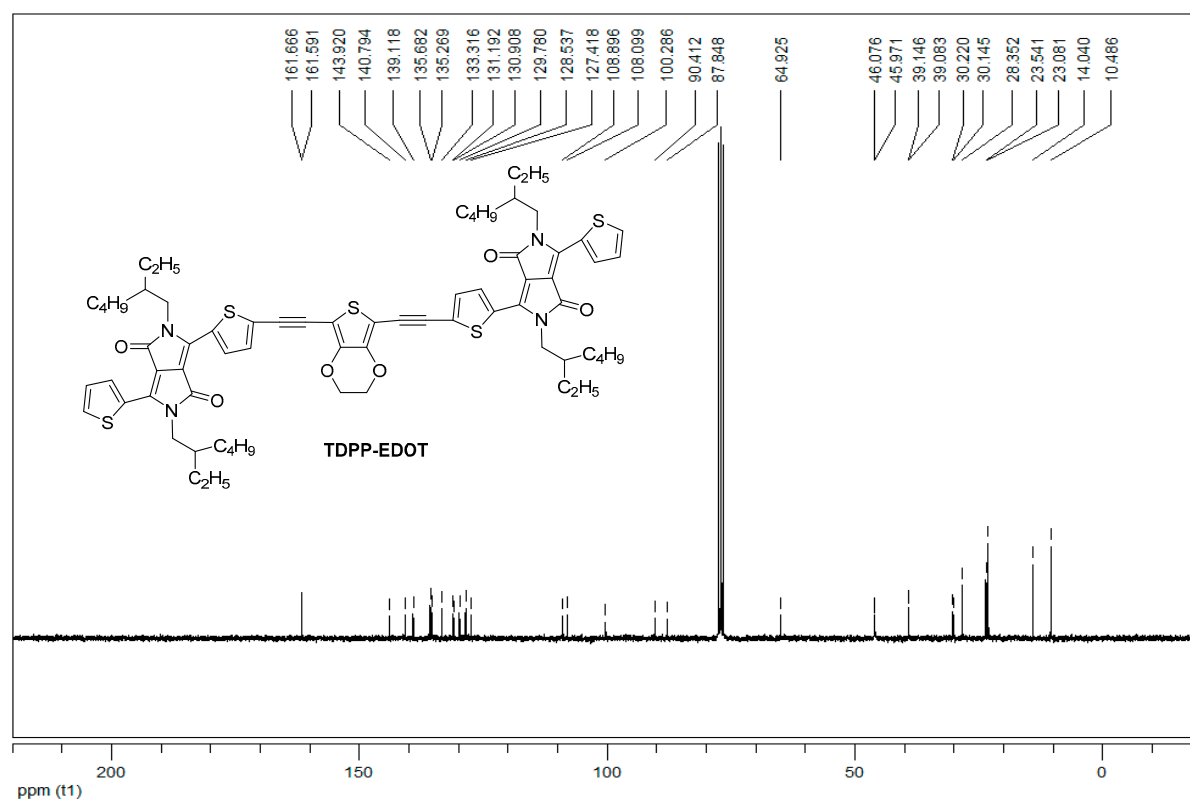

**Figure S4.** <sup>13</sup>C NMR (75 MHz, CDCl<sub>3</sub>) spectrum of compound TDPP-EDOT.
